# Supplementary material for: In situ study of environmental factors (temperature and salinity) affecting cohort patterns and growth rates in Ciona robusta
Source: PeerJ. 2025 Sep 18;13:e20034. doi: 10.7717/peerj.20034 (PMC12450370; doi:10.7717/peerj.20034)
Supplement: Supplemental Information 7 — Raw measurement data of Ciona robusta [file peerj-13-20034-s007.xlsx]

## Sheet: raw
Survey	Site	Date	Y	M	D	Season	Sample	length	wet	dry
1	Mokpo	2022-06-26	2022	6	26	2	1	54	10.57	0.7
1	Mokpo	2022-06-26	2022	6	26	2	2	49	1.99	0.12
1	Mokpo	2022-06-26	2022	6	26	2	3	110	28.88	1.52
1	Mokpo	2022-06-26	2022	6	26	2	4	65	10.73	0.59
1	Mokpo	2022-06-26	2022	6	26	2	5	25	2.03	0.12
1	Mokpo	2022-06-26	2022	6	26	2	6	28	1.16	0.05
1	Mokpo	2022-06-26	2022	6	26	2	7	36	5.78	0.29
1	Mokpo	2022-06-26	2022	6	26	2	8	26	1.95	0.1
1	Mokpo	2022-06-26	2022	6	26	2	9	103	31.9	1.74
1	Mokpo	2022-06-26	2022	6	26	2	10	38	3.71	0.19
1	Mokpo	2022-06-26	2022	6	26	2	11	38	8.11	0.37
1	Mokpo	2022-06-26	2022	6	26	2	12	69	11.13	0.51
1	Mokpo	2022-06-26	2022	6	26	2	13	30	2.49	0.14
1	Mokpo	2022-06-26	2022	6	26	2	14	34	4.8	0.26
1	Mokpo	2022-06-26	2022	6	26	2	15	35	3.88	0.19
1	Mokpo	2022-06-26	2022	6	26	2	16	43	4.28	0.23
1	Mokpo	2022-06-26	2022	6	26	2	17	72	25.35	1.51
1	Mokpo	2022-06-26	2022	6	26	2	18	105	29.33	1.43
1	Mokpo	2022-06-26	2022	6	26	2	19	40	6.01	0.3
1	Mokpo	2022-06-26	2022	6	26	2	20	70	26.55	1.55
1	Mokpo	2022-06-26	2022	6	26	2	21	92	21.26	1.34
1	Mokpo	2022-06-26	2022	6	26	2	22	49	8.49	0.44
1	Mokpo	2022-06-26	2022	6	26	2	23	33	3.98	0.18
1	Mokpo	2022-06-26	2022	6	26	2	24	29	1.03	0.02
1	Mokpo	2022-06-26	2022	6	26	2	25	54	6.46	0.36
1	Mokpo	2022-06-26	2022	6	26	2	26	61	15.56	1.15
1	Mokpo	2022-06-26	2022	6	26	2	27	42	5.08	0.25
1	Mokpo	2022-06-26	2022	6	26	2	28	50	7.61	0.34
1	Mokpo	2022-06-26	2022	6	26	2	29	62	5.98	0.29
1	Mokpo	2022-06-26	2022	6	26	2	30	44	5.65	0.33
1	Mokpo	2022-06-26	2022	6	26	2	31	70	12.82	0.62
1	Mokpo	2022-06-26	2022	6	26	2	32	24	2.36	0.15
1	Mokpo	2022-06-26	2022	6	26	2	33	29	1.8	0.09
1	Mokpo	2022-06-26	2022	6	26	2	34	49	9.65	0.46
1	Mokpo	2022-06-26	2022	6	26	2	35	43	7.89	0.35
1	Mokpo	2022-06-26	2022	6	26	2	36	43	3.87	0.2
1	Mokpo	2022-06-26	2022	6	26	2	37	32	3.07	0.14
1	Mokpo	2022-06-26	2022	6	26	2	38	73	17.54	0.89
1	Mokpo	2022-06-26	2022	6	26	2	39	39	4.86	0.25
1	Mokpo	2022-06-26	2022	6	26	2	40	60	8.26	0.38
1	Mokpo	2022-06-26	2022	6	26	2	41	54	6.09	0.28
1	Mokpo	2022-06-26	2022	6	26	2	42	40	3.99	0.26
1	Mokpo	2022-06-26	2022	6	26	2	43	98	32.1	1.5
1	Mokpo	2022-06-26	2022	6	26	2	43	101	30.9	1.64
1	Mokpo	2022-06-26	2022	6	26	2	44	69	20.89	1.27
1	Mokpo	2022-06-26	2022	6	26	2	45	61	7.78	0.4
1	Mokpo	2022-06-26	2022	6	26	2	46	48	7.86	0.34
1	Mokpo	2022-06-26	2022	6	26	2	47	42	4.3	0.21
1	Mokpo	2022-06-26	2022	6	26	2	48	55	11.55	0.68
1	Mokpo	2022-06-26	2022	6	26	2	49	31	4.25	0.22
1	Mokpo	2022-06-26	2022	6	26	2	50	32	2.49	0.15
1	Mokpo	2022-06-26	2022	6	26	2	51	69	8.75
1	Mokpo	2022-06-26	2022	6	26	2	52	70	14.69	0.59
1	Mokpo	2022-06-26	2022	6	26	2	53	49	8.99	0.45
1	Mokpo	2022-06-26	2022	6	26	2	54	50	5.5	0.26
1	Mokpo	2022-06-26	2022	6	26	2	55	54	13.21	0.66
1	Mokpo	2022-06-26	2022	6	26	2	56	73	16.96	1.12
1	Mokpo	2022-06-26	2022	6	26	2	57	50	13.77	0.75
1	Mokpo	2022-06-26	2022	6	26	2	58	53	11.59	0.61
2	Mokpo	2022-07-09	2022	7	9	2	1	50	4.05	0.27
2	Mokpo	2022-07-09	2022	7	9	2	2	33	2.38	0.14
2	Mokpo	2022-07-09	2022	7	9	2	3	33	2.94	0.19
2	Mokpo	2022-07-09	2022	7	9	2	4	9	0.11	0.003
2	Mokpo	2022-07-09	2022	7	9	2	5	21	0.9	0.04
2	Mokpo	2022-07-09	2022	7	9	2	6	18	0.81	0.03
2	Mokpo	2022-07-09	2022	7	9	2	7	12	0.49	0.01
2	Mokpo	2022-07-09	2022	7	9	2	9	20	0.69	0.03
2	Mokpo	2022-07-09	2022	7	9	2	11	67	22	1.35
2	Mokpo	2022-07-09	2022	7	9	2	12	18	0.3	0.03
2	Mokpo	2022-07-09	2022	7	9	2	13	100	25.16	1.32
2	Mokpo	2022-07-09	2022	7	9	2	14	90	21.9	1.43
2	Mokpo	2022-07-09	2022	7	9	2	15	45	1.82	0.11
2	Mokpo	2022-07-09	2022	7	9	2	16	72	20.29	1.42
2	Mokpo	2022-07-09	2022	7	9	2	17	37	6.37	0.31
2	Mokpo	2022-07-09	2022	7	9	2	18	87	15.71	1.35
2	Mokpo	2022-07-09	2022	7	9	2	19	137	31.59	1.63
2	Mokpo	2022-07-09	2022	7	9	2	20	55	12.45	0.64
2	Mokpo	2022-07-09	2022	7	9	2	21	17	0.24	0.06
2	Mokpo	2022-07-09	2022	7	9	2	23	49	13.97	0.84
2	Mokpo	2022-07-09	2022	7	9	2	24	70	17.15	0.81
2	Mokpo	2022-07-09	2022	7	9	2	25	59	22.49	1.09
2	Mokpo	2022-07-09	2022	7	9	2	26	8	0.08	0.003
2	Mokpo	2022-07-09	2022	7	9	2	27	10	0.18	0.004
2	Mokpo	2022-07-09	2022	7	9	2	28	9	0.06	0.001
2	Mokpo	2022-07-09	2022	7	9	2	29	16	0.22	0.005
2	Mokpo	2022-07-09	2022	7	9	2	30	14	0.15	0.004
2	Mokpo	2022-07-09	2022	7	9	2	38	11	0.15	0.02
2	Mokpo	2022-07-09	2022	7	9	2	39	15	1.22	0.1
2	Mokpo	2022-07-09	2022	7	9	2	40	34	1.94	0.13
2	Mokpo	2022-07-09	2022	7	9	2	41	50	6.51	0.39
2	Mokpo	2022-07-09	2022	7	9	2	42	50	4.56	0.25
2	Mokpo	2022-07-09	2022	7	9	2	43	48	6.88	0.38
2	Mokpo	2022-07-09	2022	7	9	2	44	60	9.43	0.43
2	Mokpo	2022-07-09	2022	7	9	2	45	24	0.87	0.004
2	Mokpo	2022-07-09	2022	7	9	2	46	68	14.5	0.68
2	Mokpo	2022-07-09	2022	7	9	2	47	94	29.65	1.65
2	Mokpo	2022-07-09	2022	7	9	2	48	42	2.67	0.15
2	Mokpo	2022-07-09	2022	7	9	2	49	50	5.07	0.28
2	Mokpo	2022-07-09	2022	7	9	2	51	55	7.06	0.43
2	Mokpo	2022-07-09	2022	7	9	2	52	28	1.43	0.06
2	Mokpo	2022-07-09	2022	7	9	2	53	55	7.62	0.37
2	Mokpo	2022-07-09	2022	7	9	2	54	78	8.65	0.46
2	Mokpo	2022-07-09	2022	7	9	2	55	42	4.22	0.3
2	Mokpo	2022-07-09	2022	7	9	2	56	44	7.3	0.47
2	Mokpo	2022-07-09	2022	7	9	2	57	35	3.72	0.22
2	Mokpo	2022-07-09	2022	7	9	2	58	46	9.19	0.53
2	Mokpo	2022-07-09	2022	7	9	2	59	28	4.85	0.29
2	Mokpo	2022-07-09	2022	7	9	2	60	38	2.99	0.2
2	Mokpo	2022-07-09	2022	7	9	2	61	45	4.7	0.34
2	Mokpo	2022-07-09	2022	7	9	2	62	30	1.76	0.11
2	Mokpo	2022-07-09	2022	7	9	2	64	93	35.8	2.04
3	Mokpo	2022-07-23	2022	7	23	2	1	20	0.54	0.01
3	Mokpo	2022-07-23	2022	7	23	2	2	79	17.14	0.87
3	Mokpo	2022-07-23	2022	7	23	2	3	36	4.86	0.29
3	Mokpo	2022-07-23	2022	7	23	2	4	27	2.43	0.13
3	Mokpo	2022-07-23	2022	7	23	2	5	98	26.46	1.05
3	Mokpo	2022-07-23	2022	7	23	2	5	103	21.1	1.2
3	Mokpo	2022-07-23	2022	7	23	2	5	100	27	1.1
3	Mokpo	2022-07-23	2022	7	23	2	6	82	19.99	0.8
3	Mokpo	2022-07-23	2022	7	23	2	7	65	19.19	0.96
3	Mokpo	2022-07-23	2022	7	23	2	8	93	18.45	0.82
3	Mokpo	2022-07-23	2022	7	23	2	9	67	7.29	0.42
3	Mokpo	2022-07-23	2022	7	23	2	10	65	13.12	0.8
3	Mokpo	2022-07-23	2022	7	23	2	11	14	0.17	0.003
3	Mokpo	2022-07-23	2022	7	23	2	12	95	12.49	1
3	Mokpo	2022-07-23	2022	7	23	2	13	22	0.36	0.003
3	Mokpo	2022-07-23	2022	7	23	2	14	68	21.57	1.03
3	Mokpo	2022-07-23	2022	7	23	2	15	103	20.93	1.15
3	Mokpo	2022-07-23	2022	7	23	2	16	25	1.17	0.07
3	Mokpo	2022-07-23	2022	7	23	2	17	57	7.17	0.36
3	Mokpo	2022-07-23	2022	7	23	2	18	50	9.96	0.51
3	Mokpo	2022-07-23	2022	7	23	2	19	70	16.61	0.75
3	Mokpo	2022-07-23	2022	7	23	2	20	32	0.94	0.05
3	Mokpo	2022-07-23	2022	7	23	2	21	59	13.48	0.6
3	Mokpo	2022-07-23	2022	7	23	2	22	80	26.78	1.14
3	Mokpo	2022-07-23	2022	7	23	2	23	35	3.18	0.14
3	Mokpo	2022-07-23	2022	7	23	2	24	95	14.11	0.66
3	Mokpo	2022-07-23	2022	7	23	2	25	86	6.9	0.3
3	Mokpo	2022-07-23	2022	7	23	2	26	124	25.4	1.42
3	Mokpo	2022-07-23	2022	7	23	2	27	52	3.47	0.15
3	Mokpo	2022-07-23	2022	7	23	2	28	98	24.1	1.01
3	Mokpo	2022-07-23	2022	7	23	2	29	14	0.17	0.004
3	Mokpo	2022-07-23	2022	7	23	2	30	65	3.63	0.22
3	Mokpo	2022-07-23	2022	7	23	2	31	63	10.41	0.52
3	Mokpo	2022-07-23	2022	7	23	2	32	45	4.09	0.25
3	Mokpo	2022-07-23	2022	7	23	2	33	54	5.03	0.26
3	Mokpo	2022-07-23	2022	7	23	2	34	71	18.92	0.86
3	Mokpo	2022-07-23	2022	7	23	2	35	25	0.86	0.05
3	Mokpo	2022-07-23	2022	7	23	2	36	35	0.93	0.05
3	Mokpo	2022-07-23	2022	7	23	2	37	24	0.48	0.01
3	Mokpo	2022-07-23	2022	7	23	2	38	72	6.27	0.31
3	Mokpo	2022-07-23	2022	7	23	2	39	106	20.48	1.92
3	Mokpo	2022-07-23	2022	7	23	2	40	91	16.56	0.68
3	Mokpo	2022-07-23	2022	7	23	2	41	13	0.24	0.004
3	Mokpo	2022-07-23	2022	7	23	2	42	45	5.49	0.3
3	Mokpo	2022-07-23	2022	7	23	2	43	23	0.44	0.01
3	Mokpo	2022-07-23	2022	7	23	2	44	26	0.53	0.02
3	Mokpo	2022-07-23	2022	7	23	2	45	63	4.4	0.29
3	Mokpo	2022-07-23	2022	7	23	2	46	103	16.42	0.9
3	Mokpo	2022-07-23	2022	7	23	2	47	72	23.27	0.91
3	Mokpo	2022-07-23	2022	7	23	2	48	32	0.94	0.05
3	Mokpo	2022-07-23	2022	7	23	2	49	126	41.6	1.86
3	Mokpo	2022-07-23	2022	7	23	2	50	62	14.07	0.66
3	Mokpo	2022-07-23	2022	7	23	2	51
3	Mokpo	2022-07-23	2022	7	23	2	52	42	4.36	0.23
3	Mokpo	2022-07-23	2022	7	23	2	53	78	15.32	0.68
3	Mokpo	2022-07-23	2022	7	23	2	54	25	0.31	0.006
3	Mokpo	2022-07-23	2022	7	23	2	55	75	9.03	0.46
3	Mokpo	2022-07-23	2022	7	23	2	56	60	14.77	0.65
3	Mokpo	2022-07-23	2022	7	23	2	57	70	6.17	0.33
3	Mokpo	2022-07-23	2022	7	23	2	58	16	0.19	0.01
3	Mokpo	2022-07-23	2022	7	23	2	59	92	12.48	0.62
3	Mokpo	2022-07-23	2022	7	23	2	60	68	8.77	0.36
3	Mokpo	2022-07-23	2022	7	23	2	61	36	4.68	0.26
3	Mokpo	2022-07-23	2022	7	23	2	62	90	18.3	0.78
3	Mokpo	2022-07-23	2022	7	23	2	63	69	14.5	0.78
3	Mokpo	2022-07-23	2022	7	23	2	64	58	7.18	0.52
3	Mokpo	2022-07-23	2022	7	23	2	65	40	3.29	0.19
3	Mokpo	2022-07-23	2022	7	23	2	66	42	6.6	0.32
3	Mokpo	2022-07-23	2022	7	23	2	67	48	9.71	0.39
3	Mokpo	2022-07-23	2022	7	23	2	68	36	3.75	0.26
3	Mokpo	2022-07-23	2022	7	23	2	69	42	4.04	0.2
3	Mokpo	2022-07-23	2022	7	23	2	70	70	20.86	0.94
3	Mokpo	2022-07-23	2022	7	23	2	71	30	2.29	0.14
4	Mokpo	2022-08-05	2022	8	5	2	1	54	5.54	0.24
4	Mokpo	2022-08-05	2022	8	5	2	2	12	0.32	0.005
4	Mokpo	2022-08-05	2022	8	5	2	3	83	29.03	0.89
4	Mokpo	2022-08-05	2022	8	5	2	4	107	32.88	1.48
4	Mokpo	2022-08-05	2022	8	5	2	5	20	0.64	0.02
4	Mokpo	2022-08-05	2022	8	5	2	6	150	38.26	1.37
4	Mokpo	2022-08-05	2022	8	5	2	6	138	36.4	1.08
4	Mokpo	2022-08-05	2022	8	5	2	6	140	37.4	1.1
4	Mokpo	2022-08-05	2022	8	5	2	7	114	23.2	0.8
4	Mokpo	2022-08-05	2022	8	5	2	8	52	6.06	0.21
4	Mokpo	2022-08-05	2022	8	5	2	9	26	1.9	0.05
4	Mokpo	2022-08-05	2022	8	5	2	10	40	6.32	0.23
4	Mokpo	2022-08-05	2022	8	5	2	11	46	5	0.24
4	Mokpo	2022-08-05	2022	8	5	2	12	64	12.35	0.51
4	Mokpo	2022-08-05	2022	8	5	2	13	35	3.23	0.17
4	Mokpo	2022-08-05	2022	8	5	2	14	89	21.11	0.79
4	Mokpo	2022-08-05	2022	8	5	2	15	46	5.1	0.27
4	Mokpo	2022-08-05	2022	8	5	2	16	45	6.5	0.29
4	Mokpo	2022-08-05	2022	8	5	2	17	100	11.58	0.45
4	Mokpo	2022-08-05	2022	8	5	2	18	53	10.59	0.51
4	Mokpo	2022-08-05	2022	8	5	2	19	121	21.85	0.78
4	Mokpo	2022-08-05	2022	8	5	2	20	90	20.87	1.06
4	Mokpo	2022-08-05	2022	8	5	2	21	82	16.84	0.61
4	Mokpo	2022-08-05	2022	8	5	2	22	84	21.08	0.79
4	Mokpo	2022-08-05	2022	8	5	2	24	60	7.92	0.33
4	Mokpo	2022-08-05	2022	8	5	2	25	70	18.45	0.62
4	Mokpo	2022-08-05	2022	8	5	2	26	75	15.65	0.6
4	Mokpo	2022-08-05	2022	8	5	2	27	44	6.06	0.31
4	Mokpo	2022-08-05	2022	8	5	2	28	9	0.03	0.001
4	Mokpo	2022-08-05	2022	8	5	2	29	41	2.79	0.14
4	Mokpo	2022-08-05	2022	8	5	2	30	46	6.9	0.35
4	Mokpo	2022-08-05	2022	8	5	2	31	49	7	0.4
4	Mokpo	2022-08-05	2022	8	5	2	32	11	0.26	0.002
4	Mokpo	2022-08-05	2022	8	5	2	33	40	3.82	0.16
4	Mokpo	2022-08-05	2022	8	5	2	34	23	1.15	0.04
4	Mokpo	2022-08-05	2022	8	5	2	35	19	0.37	0.005
4	Mokpo	2022-08-05	2022	8	5	2	36	120	20.34	0.95
4	Mokpo	2022-08-05	2022	8	5	2	37	41	2.36	0.16
4	Mokpo	2022-08-05	2022	8	5	2	38	28	0.98	0.04
4	Mokpo	2022-08-05	2022	8	5	2	39	35	2.38	0.14
4	Mokpo	2022-08-05	2022	8	5	2	40	31	2.52	0.12
4	Mokpo	2022-08-05	2022	8	5	2	41	35	2.9	0.16
4	Mokpo	2022-08-05	2022	8	5	2	42	33	2.17	0.11
4	Mokpo	2022-08-05	2022	8	5	2	43	33	1.94	0.08
4	Mokpo	2022-08-05	2022	8	5	2	45	30	1.45	0.08
4	Mokpo	2022-08-05	2022	8	5	2	46	34	2.16	0.13
4	Mokpo	2022-08-05	2022	8	5	2	47	62	5.92	0.35
4	Mokpo	2022-08-05	2022	8	5	2	48	20	0.38	0.01
4	Mokpo	2022-08-05	2022	8	5	2	49	29	2.33	0.1
4	Mokpo	2022-08-05	2022	8	5	2	50	73	17.12	0.89
4	Mokpo	2022-08-05	2022	8	5	2	51	25	0.87	0.01
4	Mokpo	2022-08-05	2022	8	5	2	52	24	0.37	0.006
4	Mokpo	2022-08-05	2022	8	5	2	53	41	2.88	0.14
5	Mokpo	2022-08-20	2022	8	20	2	1	109	13.61	0.65
5	Mokpo	2022-08-20	2022	8	20	2	2	78	8.85	0.5
5	Mokpo	2022-08-20	2022	8	20	2	3	24	1.98	0.12
5	Mokpo	2022-08-20	2022	8	20	2	4	60	6.41	0.36
5	Mokpo	2022-08-20	2022	8	20	2	5	65	2.86	0.46
5	Mokpo	2022-08-20	2022	8	20	2	6	27	1.27	0.08
5	Mokpo	2022-08-20	2022	8	20	2	7	21	0.69	0.06
5	Mokpo	2022-08-20	2022	8	20	2	8	110	25.26	1.48
5	Mokpo	2022-08-20	2022	8	20	2	9	28	1.84	0.1
5	Mokpo	2022-08-20	2022	8	20	2	10	78	8.44	0.45
5	Mokpo	2022-08-20	2022	8	20	2	11	38	2.94	0.17
5	Mokpo	2022-08-20	2022	8	20	2	12	19	0.57	0.04
5	Mokpo	2022-08-20	2022	8	20	2	13	51	4.29	0.25
5	Mokpo	2022-08-20	2022	8	20	2	14	54	6.82	0.37
5	Mokpo	2022-08-20	2022	8	20	2	15	18	0.68	0.03
5	Mokpo	2022-08-20	2022	8	20	2	16	92	14.34	0.78
5	Mokpo	2022-08-20	2022	8	20	2	17	128	31.09	1.57
5	Mokpo	2022-08-20	2022	8	20	2	18	21	0.75	0.03
5	Mokpo	2022-08-20	2022	8	20	2	19	40	2.16	0.13
5	Mokpo	2022-08-20	2022	8	20	2	20	127	20.08	1.02
5	Mokpo	2022-08-20	2022	8	20	2	21	116	25.51	1.25
5	Mokpo	2022-08-20	2022	8	20	2	22	81	6.72	0.34
5	Mokpo	2022-08-20	2022	8	20	2	24	31	1.51	0.09
5	Mokpo	2022-08-20	2022	8	20	2	25	115	22.89	1.07
5	Mokpo	2022-08-20	2022	8	20	2	26	93	28.9	2.17
5	Mokpo	2022-08-20	2022	8	20	2	27	21	0.62	0.02
5	Mokpo	2022-08-20	2022	8	20	2	28	38	4.11	0.23
5	Mokpo	2022-08-20	2022	8	20	2	29	61	11.65	0.55
5	Mokpo	2022-08-20	2022	8	20	2	30	20	0.55	0.01
5	Mokpo	2022-08-20	2022	8	20	2	31	58	5.21	0.28
5	Mokpo	2022-08-20	2022	8	20	2	32	92	20.11	1.04
5	Mokpo	2022-08-20	2022	8	20	2	33	28	1.29	0.06
5	Mokpo	2022-08-20	2022	8	20	2	34	22	1.28	0.07
5	Mokpo	2022-08-20	2022	8	20	2	35	22	0.84	0.05
5	Mokpo	2022-08-20	2022	8	20	2	36	72	9.02	0.44
5	Mokpo	2022-08-20	2022	8	20	2	37	22	0.69	0.03
5	Mokpo	2022-08-20	2022	8	20	2	38	13	0.37	0.01
5	Mokpo	2022-08-20	2022	8	20	2	39	70	13.46	0.72
5	Mokpo	2022-08-20	2022	8	20	2	40	73	12.94	0.62
5	Mokpo	2022-08-20	2022	8	20	2	41	36	3.38	0.22
5	Mokpo	2022-08-20	2022	8	20	2	42	21	1.13	0.06
5	Mokpo	2022-08-20	2022	8	20	2	43	18	1.06	0.05
5	Mokpo	2022-08-20	2022	8	20	2	44	34	3.23	0.17
5	Mokpo	2022-08-20	2022	8	20	2	45	32	3.78	0.21
5	Mokpo	2022-08-20	2022	8	20	2	46	43	4.16	0.24
5	Mokpo	2022-08-20	2022	8	20	2	47	40	3.38	0.2
5	Mokpo	2022-08-20	2022	8	20	2	48	22	1.77	0.1
5	Mokpo	2022-08-20	2022	8	20	2	49	58	4.36	0.24
5	Mokpo	2022-08-20	2022	8	20	2	50	23	1.77	0.11
5	Mokpo	2022-08-20	2022	8	20	2	51	48	1.78	0.13
5	Mokpo	2022-08-20	2022	8	20	2	52
5	Mokpo	2022-08-20	2022	8	20	2	53	20	1.05	0.06
5	Mokpo	2022-08-20	2022	8	20	2	54	57	4.21	0.32
5	Mokpo	2022-08-20	2022	8	20	2	55	125	20.88	1.1
5	Mokpo	2022-08-20	2022	8	20	2	56	35	4.89	0.3
5	Mokpo	2022-08-20	2022	8	20	2	57	77	18.01	0.98
5	Mokpo	2022-08-20	2022	8	20	2	58	59	12.91	0.68
5	Mokpo	2022-08-20	2022	8	20	2	59	57	4.92	0.24
5	Mokpo	2022-08-20	2022	8	20	2	60	18	0.77	0.04
5	Mokpo	2022-08-20	2022	8	20	2	60	135	31.16	2.04
6	Mokpo	2022-09-03	2022	9	3	3	1	86	17.58	1.11
6	Mokpo	2022-09-03	2022	9	3	3	2	73	8.98	0.58
6	Mokpo	2022-09-03	2022	9	3	3	3	82	17.27	0.97
6	Mokpo	2022-09-03	2022	9	3	3	4	48	5.03	0.34
6	Mokpo	2022-09-03	2022	9	3	3	5	116	28.76	1.07
6	Mokpo	2022-09-03	2022	9	3	3	6	103	23.9	1.55
6	Mokpo	2022-09-03	2022	9	3	3	7	26	3.21	0.08
6	Mokpo	2022-09-03	2022	9	3	3	8	78	9.01	0.64
6	Mokpo	2022-09-03	2022	9	3	3	9	86	20.99	1.36
6	Mokpo	2022-09-03	2022	9	3	3	10	106	28.52	1.66
6	Mokpo	2022-09-03	2022	9	3	3	11	91	22.69	1.17
6	Mokpo	2022-09-03	2022	9	3	3	12	91	21.59	1.74
6	Mokpo	2022-09-03	2022	9	3	3	13	79	19.28	1.3
6	Mokpo	2022-09-03	2022	9	3	3	14	30	4.3	0.29
6	Mokpo	2022-09-03	2022	9	3	3	15	78	9.02	0.59
6	Mokpo	2022-09-03	2022	9	3	3	16	26	2.26	0.15
6	Mokpo	2022-09-03	2022	9	3	3	17	72	8.52	0.5
6	Mokpo	2022-09-03	2022	9	3	3	18	51	5.02	0.34
6	Mokpo	2022-09-03	2022	9	3	3	19	73	8.82	0.58
6	Mokpo	2022-09-03	2022	9	3	3	20	95	16.33	0.95
6	Mokpo	2022-09-03	2022	9	3	3	21	74	8.61	0.57
6	Mokpo	2022-09-03	2022	9	3	3	22	85	15.24	0.92
6	Mokpo	2022-09-03	2022	9	3	3	23	42	7.04	0.17
6	Mokpo	2022-09-03	2022	9	3	3	24	83	17.56	1.09
6	Mokpo	2022-09-03	2022	9	3	3	25	40	6.04	0.12
6	Mokpo	2022-09-03	2022	9	3	3	26	23	2.27	0.16
6	Mokpo	2022-09-03	2022	9	3	3	27	22	1.52	0.1
6	Mokpo	2022-09-03	2022	9	3	3	28	33	3.92	0.25
6	Mokpo	2022-09-03	2022	9	3	3	29	61	9.27	0.56
6	Mokpo	2022-09-03	2022	9	3	3	30	68	5.14	0.34
6	Mokpo	2022-09-03	2022	9	3	3	31	39	5.55	0.2
6	Mokpo	2022-09-03	2022	9	3	3	32	59	5.57	0.35
6	Mokpo	2022-09-03	2022	9	3	3	33	63	6.41	0.4
6	Mokpo	2022-09-03	2022	9	3	3	34	31	3.37	0.23
6	Mokpo	2022-09-03	2022	9	3	3	35	76	8.93	0.57
6	Mokpo	2022-09-03	2022	9	3	3	36	21	0.97	0.06
6	Mokpo	2022-09-03	2022	9	3	3	37	60	8.46	0.52
6	Mokpo	2022-09-03	2022	9	3	3	38	83	13.06	0.75
6	Mokpo	2022-09-03	2022	9	3	3	39	38	5.75	0.25
6	Mokpo	2022-09-03	2022	9	3	3	40	93	10.65	0.59
6	Mokpo	2022-09-03	2022	9	3	3	41	87	13.74	0.8
6	Mokpo	2022-09-03	2022	9	3	3	42	23	1.8	0.14
6	Mokpo	2022-09-03	2022	9	3	3	43	34	3.36	0.25
6	Mokpo	2022-09-03	2022	9	3	3	44	70	6.34	0.38
6	Mokpo	2022-09-03	2022	9	3	3	45	90	8.53	0.5
6	Mokpo	2022-09-03	2022	9	3	3	46	23	1.04	0.07
6	Mokpo	2022-09-03	2022	9	3	3	47	14	0.51	0.05
6	Mokpo	2022-09-03	2022	9	3	3	48	28	0.81	0.07
6	Mokpo	2022-09-03	2022	9	3	3	49	93	9.37	0.55
6	Mokpo	2022-09-03	2022	9	3	3	50	81	19.79	1.23
6	Mokpo	2022-09-03	2022	9	3	3	51	26	1.19	0.24
6	Mokpo	2022-09-03	2022	9	3	3	52	24	0.82	0.09
6	Mokpo	2022-09-03	2022	9	3	3	53	46	8.29	0.49
6	Mokpo	2022-09-03	2022	9	3	3	54	120	38.55	1.76
6	Mokpo	2022-09-03	2022	9	3	3	55	138	32.16	2.04
6	Mokpo	2022-09-03	2022	9	3	3	56	31	1.66	0.15
6	Mokpo	2022-09-03	2022	9	3	3	57	23	1.86	0.17
6	Mokpo	2022-09-03	2022	9	3	3	58	65	8.54	0.46
6	Mokpo	2022-09-03	2022	9	3	3	59	14	0.31	0.008
6	Mokpo	2022-09-03	2022	9	3	3	60	25	1.58	0.15
7	Mokpo	2022-09-17	2022	9	17	3	1	34	3.42	0.2
7	Mokpo	2022-09-17	2022	9	17	3	2	53	5.46	0.35
7	Mokpo	2022-09-17	2022	9	17	3	3	62	4.46	0.29
7	Mokpo	2022-09-17	2022	9	17	3	4	75	18.63	1.18
7	Mokpo	2022-09-17	2022	9	17	3	5	31	2.08	0.18
7	Mokpo	2022-09-17	2022	9	17	3	6	53	4.91	0.31
7	Mokpo	2022-09-17	2022	9	17	3	7	60	8.13	0.44
7	Mokpo	2022-09-17	2022	9	17	3	8	53	5.18	0.36
7	Mokpo	2022-09-17	2022	9	17	3	9	53	7.58	0.39
7	Mokpo	2022-09-17	2022	9	17	3	10	63	7.25	0.43
7	Mokpo	2022-09-17	2022	9	17	3	11	29	2.87	0.19
7	Mokpo	2022-09-17	2022	9	17	3	12	48	4.33	0.27
7	Mokpo	2022-09-17	2022	9	17	3	13	85	11.68	0.84
7	Mokpo	2022-09-17	2022	9	17	3	14	33	4.54	0.26
7	Mokpo	2022-09-17	2022	9	17	3	15	43	6.06	0.33
7	Mokpo	2022-09-17	2022	9	17	3	16	48	7.57	0.48
7	Mokpo	2022-09-17	2022	9	17	3	17	60	5.44	0.31
7	Mokpo	2022-09-17	2022	9	17	3	18	60	5.76	0.37
7	Mokpo	2022-09-17	2022	9	17	3	19	29	2.21	0.18
7	Mokpo	2022-09-17	2022	9	17	3	20	35	4.05	0.28
7	Mokpo	2022-09-17	2022	9	17	3	21	48	3.96	0.3
7	Mokpo	2022-09-17	2022	9	17	3	22	72	8.86	0.5
7	Mokpo	2022-09-17	2022	9	17	3	23	32	2.06	0.14
7	Mokpo	2022-09-17	2022	9	17	3	24	55	4.79	0.28
7	Mokpo	2022-09-17	2022	9	17	3	25	73	9.72	0.68
7	Mokpo	2022-09-17	2022	9	17	3	26	57	10.18	0.68
7	Mokpo	2022-09-17	2022	9	17	3	27	51	5.94	0.46
7	Mokpo	2022-09-17	2022	9	17	3	28	52	7.64	0.5
7	Mokpo	2022-09-17	2022	9	17	3	29	48	3.32	0.21
7	Mokpo	2022-09-17	2022	9	17	3	30	42	5.15	0.33
7	Mokpo	2022-09-17	2022	9	17	3	31	92	10.31	0.65
7	Mokpo	2022-09-17	2022	9	17	3	32	53	5.96	0.46
7	Mokpo	2022-09-17	2022	9	17	3	33	56	10.3	0.58
7	Mokpo	2022-09-17	2022	9	17	3	34	57	4.1	0.31
7	Mokpo	2022-09-17	2022	9	17	3	35	30	3.16	0.22
7	Mokpo	2022-09-17	2022	9	17	3	36	48	5.23	0.34
7	Mokpo	2022-09-17	2022	9	17	3	37	53	6.1	0.38
7	Mokpo	2022-09-17	2022	9	17	3	38	44	4.03	0.27
7	Mokpo	2022-09-17	2022	9	17	3	39	26	1.82	0.16
7	Mokpo	2022-09-17	2022	9	17	3	40	46	3.74	0.23
7	Mokpo	2022-09-17	2022	9	17	3	41	29	1.94	0.12
7	Mokpo	2022-09-17	2022	9	17	3	42	41	4.82	0.33
7	Mokpo	2022-09-17	2022	9	17	3	43	30	1.69	0.1
7	Mokpo	2022-09-17	2022	9	17	3	44	42	3.29	0.22
7	Mokpo	2022-09-17	2022	9	17	3	45	35	2.24	0.12
7	Mokpo	2022-09-17	2022	9	17	3	46	39	5.21	0.31
7	Mokpo	2022-09-17	2022	9	17	3	47	53	4.99	0.38
7	Mokpo	2022-09-17	2022	9	17	3	48	56	5.33	0.38
7	Mokpo	2022-09-17	2022	9	17	3	49	35	2.74	0.14
7	Mokpo	2022-09-17	2022	9	17	3	50	65	11	0.57
7	Mokpo	2022-09-17	2022	9	17	3	51	33	3.66	0.24
7	Mokpo	2022-09-17	2022	9	17	3	52	52	7.68	0.46
7	Mokpo	2022-09-17	2022	9	17	3	53	76	7.56	0.5
7	Mokpo	2022-09-17	2022	9	17	3	54	58	5.72	0.35
7	Mokpo	2022-09-17	2022	9	17	3	55	48	9.03	0.5
7	Mokpo	2022-09-17	2022	9	17	3	56	37	3.95	0.25
7	Mokpo	2022-09-17	2022	9	17	3	57	44	5.46	0.36
7	Mokpo	2022-09-17	2022	9	17	3	58	55	7.61	0.49
7	Mokpo	2022-09-17	2022	9	17	3	59	58	6.96	0.39
7	Mokpo	2022-09-17	2022	9	17	3	60	45	4.63	0.29
8	Mokpo	2022-10-01	2022	10	1	3	1	60	8.31	0.52
8	Mokpo	2022-10-01	2022	10	1	3	2	52	5.16	0.33
8	Mokpo	2022-10-01	2022	10	1	3	3	58	6.1	0.46
8	Mokpo	2022-10-01	2022	10	1	3	4	55	7.41	0.55
8	Mokpo	2022-10-01	2022	10	1	3	5	53	6.73	0.44
8	Mokpo	2022-10-01	2022	10	1	3	6	41	2.63	0.19
8	Mokpo	2022-10-01	2022	10	1	3	7	46	6.98	0.43
8	Mokpo	2022-10-01	2022	10	1	3	8	38	2.47	0.17
8	Mokpo	2022-10-01	2022	10	1	3	9	47	6.29	0.45
8	Mokpo	2022-10-01	2022	10	1	3	10	30	1.63	0.15
8	Mokpo	2022-10-01	2022	10	1	3	11	48	5.57	0.41
8	Mokpo	2022-10-01	2022	10	1	3	12	45	5.12	0.34
8	Mokpo	2022-10-01	2022	10	1	3	13	53	8.72	0.55
8	Mokpo	2022-10-01	2022	10	1	3	14	52	4.65	0.36
8	Mokpo	2022-10-01	2022	10	1	3	15	35	4.02	0.3
8	Mokpo	2022-10-01	2022	10	1	3	16	57	4.51	0.39
8	Mokpo	2022-10-01	2022	10	1	3	17	40	3.14	0.2
8	Mokpo	2022-10-01	2022	10	1	3	18	57	5.27	0.39
8	Mokpo	2022-10-01	2022	10	1	3	19	46	5.71	0.44
8	Mokpo	2022-10-01	2022	10	1	3	20	57	6.81	0.49
8	Mokpo	2022-10-01	2022	10	1	3	21	56	4.47	0.28
8	Mokpo	2022-10-01	2022	10	1	3	22	41	3.68	0.26
8	Mokpo	2022-10-01	2022	10	1	3	23	54	6.34	0.49
8	Mokpo	2022-10-01	2022	10	1	3	24	57	8.75	0.61
8	Mokpo	2022-10-01	2022	10	1	3	25	48	6.89	0.42
8	Mokpo	2022-10-01	2022	10	1	3	40	48	5.01	0.39
8	Mokpo	2022-10-01	2022	10	1	3	42	40	4.32	0.33
8	Mokpo	2022-10-01	2022	10	1	3	44	32	3.54	0.28
8	Mokpo	2022-10-01	2022	10	1	3	47	43	5.94	0.41
8	Mokpo	2022-10-01	2022	10	1	3	49	52	7.83	0.53
8	Mokpo	2022-10-01	2022	10	1	3	50	49	7.63	0.5
